# Supplementary material for: Meta-Analysis of Life Cycle Assessment Studies for Polyethylene Terephthalate Water Bottle System
Source: MDPI journal article supplement (doi:10.3390/su16020535), 2024-01-08
Supplement: s1 [file s1]

## SUPPLEMENTARY MATERIALS

Table S1. The literature screening forms with the references that passed the final screening criteria. The screening forms contain the type of reference with titles, author, year, and information of references.

|                    |                 |                                                                                                |
|--------------------|-----------------|------------------------------------------------------------------------------------------------|
| No.1               | Journal         | Cleaner Environmental Systems                                                                  |
|                    | Title           | Life cycle assessment for PET-bottle recycling in Brazil: B2B and B2F routes                   |
|                    | Author          | Luciano Antonio Gileno * and Luiz Felipe Ramos Turci                                           |
|                    | Year/Region     | 2021/ Located in Poços de Caldas, Minas Gerais State, Brazil                                   |
| Goal and Scope     | Goal            | Comparison between bottle-to-bottle and bottle-to-fiber                                        |
|                    | Functional unit | 1 t of post-consumer recycled PET resin (bottle-to-bottle)                                     |
|                    | System boundary | Cradle to gate                                                                                 |
| Inventory analysis | Software        | GaBi Education 8.7 and GHG Protocol                                                            |
|                    | Data source     | A post-consumer PET bottle recycling unit installed in the South of Minas Gerais State, Brazil |

|                    |                 |                                                                                                          |
|--------------------|-----------------|----------------------------------------------------------------------------------------------------------|
| No.2               | Journal         | Advances in Civil Engineering                                                                            |
|                    | Title           | Life-Cycle Assessment of Recycling Postconsumer High-Density Polyethylene and Polyethylene Terephthalate |
|                    | Author          | Khaled M. Bataineh                                                                                       |
|                    | Year/Region     | 2020 / Jordan                                                                                            |
| Goal and Scope     | Goal            | LCA quantifies the energy consumption and environmental emissions for PET/HDPE                           |
|                    | Functional unit | 1 t of PET flake                                                                                         |
|                    | System boundary | Cradle-to-grave                                                                                          |
| Inventory analysis | Software        | N/A                                                                                                      |
|                    | Data source     | LCA databases, scientific publications, governmental publications, and personal communication            |

|                    |                 |                                                                                                                                                             |
|--------------------|-----------------|-------------------------------------------------------------------------------------------------------------------------------------------------------------|
| No.3               | Journal         | Science of the Total Environment                                                                                                                            |
|                    | Title           | Potential trade-offs between eliminating plastics and mitigating climate change: An LCA perspective on Polyethylene Terephthalate (PET) bottles in Cornwall |
|                    | Author          | V. Kouloumpis, R.S. Pell, M.E. Correa-Cano, and X. Yan                                                                                                      |
|                    | Year/Region     | 2020/ Cornwall, England                                                                                                                                     |
| Goal and Scope     | Goal            | To evaluate the potential environmental consequences of substituting all the PET bottles used by households in Cornwall with glass ones                     |
|                    | Functional unit | 2468 t of PET bottles to households in Cornwall                                                                                                             |
|                    | System boundary | Cradle-to-grave                                                                                                                                             |
| Inventory analysis | Software        | GaBi                                                                                                                                                        |
|                    | Data source     | Ecoinvent 3.5                                                                                                                                               |

|                    |                 |                                                                                                                                                             |
|--------------------|-----------------|-------------------------------------------------------------------------------------------------------------------------------------------------------------|
| No.4               | Journal         | Environmental Research                                                                                                                                      |
|                    | Title           | Plastic (PET) vs bioplastic (PLA) or refillable aluminium bottles – What is the most sustainable choice for drinking water? A life-cycle (LCA) analysis     |
|                    | Author          | Elena Tamburini *, Stefania Costa, Daniela Summa, Letizia Battistella, Elisa Anna Fano, and Giuseppe Castaldelli                                            |
|                    | Year/Region     | 2021 / Italy                                                                                                                                                |
| Goal and Scope     | Goal            | To examine the environmental impact of production, use, and end-of-life of PET and PLA bottles in comparison to aluminum bottles in a time frame of 1 year. |
|                    | Functional unit | 1 year of use: 1095 bottles of PET                                                                                                                          |
|                    | System boundary | Cradle-to-grave                                                                                                                                             |
| Inventory analysis | Software        | OpenLCA™ v.1.8                                                                                                                                              |
|                    | Data source     | Ecoinvent                                                                                                                                                   |

|                    |                 |                                                                                               |
|--------------------|-----------------|-----------------------------------------------------------------------------------------------|
| No.5               | Journal         | Packaging Technology and Science                                                              |
|                    | Title           | Life cycle assessment of bottled mineral water for the hospitality industry in Northern Italy |
|                    | Author          | Viviana Grisales, Camilla Tua, and Lucia Rigamonti                                            |
|                    | Year/Region     | 2022/ Italy                                                                                   |
| Goal and Scope     | Goal            | To identify the impact contribution of the main stages of the system                          |
|                    | Functional unit | The distribution of 100 L mineral water                                                       |
|                    | System boundary | Cradle-to-grave                                                                               |
| Inventory analysis | Software        | SimaPro                                                                                       |
|                    | Data source     | Ecoinvent 3.5                                                                                 |

|                    |                 |                                                                                                                                            |
|--------------------|-----------------|--------------------------------------------------------------------------------------------------------------------------------------------|
| No.6               | Journal         | South African Journal of Science                                                                                                           |
|                    | Title           | Life cycle assessment of single-use and reusable plastic bottles in the city of Johannesburg                                               |
|                    | Author          | Kunle I. Olatayo, Paul T. Mativenga, and Annlizé L. Marnewick                                                                              |
|                    | Year/Region     | 2021/ South Africa                                                                                                                         |
| Goal and Scope     | Goal            | To comparatively analyze and quantify the resource consumption and environmental impacts associated with the use of single-use PET bottles |
|                    | Functional unit | 10 single-use 0.5L PET bottles                                                                                                             |
|                    | System boundary | Cradle-to-grave                                                                                                                            |
| Inventory analysis | Software        | SimaPro                                                                                                                                    |
|                    | Data source     | EcoInvent 3.0 and scientific literature                                                                                                    |

|                    |                 |                                                                                                                                                 |
|--------------------|-----------------|-------------------------------------------------------------------------------------------------------------------------------------------------|
| No.7               | Journal         | Resources, Conservation & Recycling                                                                                                             |
|                    | Title           | Assessing scaling effects of circular economy strategies: A case study on plastic bottle closed-loop recycling in the USA PET market            |
|                    | Author          | Geoffrey Lonca, Pascal Lesagea, Guillaume Majeau-Bettez, Sophie Bernard, and Manuele Margni                                                     |
|                    | Year/Region     | 2020 / USA                                                                                                                                      |
| Goal and Scope     | Goal            | To assess whether increasing rPET use within plastic bottle production leads to higher material efficiency and better environmental performance |
|                    | Functional unit | 2.78Mt PET bottle in the USA                                                                                                                    |
|                    | System boundary | Cradle-to-grave                                                                                                                                 |
| Inventory analysis | Software        | OpenLCA                                                                                                                                         |
|                    | Data source     | Ecoinvent v3.3, UN Comtrade, IBIS World dataset, and NAPCOR (2017)                                                                              |

|                    |                 |                                                                                                                                                           |
|--------------------|-----------------|-----------------------------------------------------------------------------------------------------------------------------------------------------------|
| No.8               | Journal         | Science of the Total Environment                                                                                                                          |
|                    | Title           | Comparative cradle-to-grave life cycle assessment of bio-based and petrochemical PET bottles                                                              |
|                    | Author          | Iris Vural Gursel, Christian Moretti, Lorie Hamelin, Line Geest Jakobsen, Maria Magnea Steingrimsdottir, Martin Junginger, Linda Høibye, and Li Shen      |
|                    | Year/Region     | 2021/ Europe                                                                                                                                              |
| Goal and Scope     | Goal            | To assess the environmental profiles of selected pathways for bio-based PET beverage bottles and compare them with conventional petrochemical PET bottles |
|                    | Functional unit | Packaging water in one hundred 0.5L bottles                                                                                                               |
|                    | System boundary | Cradle-to-grave                                                                                                                                           |
| Inventory analysis | Software        | EASETECH                                                                                                                                                  |
|                    | Data source     | Ecoinvent 3.3, Industry data 2.0 from PlasticsEurope                                                                                                      |

|                    |                 |                                                                                                                                                                                                             |
|--------------------|-----------------|-------------------------------------------------------------------------------------------------------------------------------------------------------------------------------------------------------------|
| No.9               | Journal         | ACS Sustainable Chemistry & Engineering                                                                                                                                                                     |
|                    | Title           | Exploring Comparative Energy and Environmental Benefits of Virgin, Recycled, and Bio-Derived PET Bottles                                                                                                    |
|                    | Author          | Pahola Thathiana Benavides, Jennifer B. Dunn, Jeongwoo Han, Mary Biddy, and Jennifer Markham                                                                                                                |
|                    | Year/Region     | 2018/ USA                                                                                                                                                                                                   |
| Goal and Scope     | Goal            | To evaluate the GHG emissions, fossil fuel consumption, and water consumption of producing one PET bottle from virgin fossil resources, recycled plastic, and biomass, considering each supply chain stage. |
|                    | Functional unit | One 26g 500mL PET bottle                                                                                                                                                                                    |
|                    | System boundary | Cradle-to-grave                                                                                                                                                                                             |
| Inventory analysis | Software        | GREET model                                                                                                                                                                                                 |
|                    | Data source     | N/A                                                                                                                                                                                                         |

|                    |                 |                                                                                                                                                                 |
|--------------------|-----------------|-----------------------------------------------------------------------------------------------------------------------------------------------------------------|
| No.10              | Journal         | Waste Management                                                                                                                                                |
|                    | Title           | Life cycle comparative assessment of pet bottle waste management options: A case study for the city of Bauru, Brazil                                            |
|                    | Author          | Eduardo J.P. Martin, Deborah S.B.L. Oliveira, Luiza S.B.L. Oliveira b, and Barbara S. Bezerra                                                                   |
|                    | Year/Region     | 2021/ Brazil                                                                                                                                                    |
| Goal and Scope     | Goal            | To assess the environmental impacts of different management options for PET waste by considering several scenarios                                              |
|                    | Functional unit | 1 t of PET waste                                                                                                                                                |
|                    | System boundary | Cradle-to-grave                                                                                                                                                 |
| Inventory analysis | Software        | SimaPro                                                                                                                                                         |
|                    | Data source     | Primary data were collected for the energy requirements and material inputs of a sorting cooperative (facility), EMDURB conventional collection, Ecoinvent v3.6 |

|                    |                 |                                                                                                                                                                                         |
|--------------------|-----------------|-----------------------------------------------------------------------------------------------------------------------------------------------------------------------------------------|
| No.11              | Journal         | Journal of Cleaner Production                                                                                                                                                           |
|                    | Title           | Comparative assessment of the environmental profile of PLA and PET drinking water bottles from a life cycle perspective                                                                 |
|                    | Author          | Seksan Papong, Pomthong Malakul, Ruethai Trungkavashirakun, Pechda Wenunun, Tassaneewan Chom-in, Mani Nithitanakul, and Ed Sarobol                                                      |
|                    | Year/Region     | 2014/ Thailand                                                                                                                                                                          |
| Goal and Scope     | Goal            | To assess the life cycle environmental performance of drinking water bottles made of polylactic acid produced from cassava in comparison with similar PET bottles produced in Thailand. |
|                    | Functional unit | 1000 units of 250 ml drinking water bottles                                                                                                                                             |
|                    | System boundary | Cradle-to-gate                                                                                                                                                                          |
| Inventory analysis | Software        | SimaPro                                                                                                                                                                                 |
|                    | Data source     | Actual sites in Thailand, Ecoinvent, MTEC, and DEDE                                                                                                                                     |

|                    |                 |                                                                                                                                      |
|--------------------|-----------------|--------------------------------------------------------------------------------------------------------------------------------------|
| No.12              | Journal         | PACKAGING SYSTEMS INCLUDING RECYCLING                                                                                                |
|                    | Title           | PET bottle reverse logistics—environmental performance of California’s CRV program                                                   |
|                    | Author          | Brandon Kuczenski and Roland Geyer                                                                                                   |
|                    | Year/Region     | 2013/ California                                                                                                                     |
| Goal and Scope     | Goal            | To compare the three main end-of-life pathways followed by CRV PET bottles: landfilling, curbside collection, and consumer drop-off. |
|                    | Functional unit | 1L of beverage to a California consumer in single-use PET bottles during the years 2007–2009                                         |
|                    | System boundary | Cradle-to-gate                                                                                                                       |
| Inventory analysis | Software        | N/A                                                                                                                                  |
|                    | Data source     | Ecoinvent 2.01, EPA eGrid database, Western Electricity Coordinating Council (WECC)                                                  |

|                    |                 |                                                                                                                                                                                                                                   |
|--------------------|-----------------|-----------------------------------------------------------------------------------------------------------------------------------------------------------------------------------------------------------------------------------|
| No.13              | Journal         | Environmental Progress & Sustainable Energy                                                                                                                                                                                       |
|                    | Title           | Life cycle assessment of polylactic acid and polyethylene terephthalate bottles for drinking water                                                                                                                                |
|                    | Author          | Fausto Gironi and Vincenzo Piemonte                                                                                                                                                                                               |
|                    | Year/Region     | 2011/ Italy                                                                                                                                                                                                                       |
| Goal and Scope     | Goal            | To examine the environmental benefits of bottles made from PLA in comparison with bottles made from PET to draw first raw considerations on the environmental reliability of PLA for the production of bottles for drinking water |
|                    | Functional unit | 1000U of 500 mL bottles to be used for drinking water                                                                                                                                                                             |
|                    | System boundary | Cradle-to-grave                                                                                                                                                                                                                   |
| Inventory analysis | Software        | SimaPro                                                                                                                                                                                                                           |
|                    | Data source     | Ecoinvent 2.0                                                                                                                                                                                                                     |

|                    |                 |                                                                                                                                                                           |
|--------------------|-----------------|---------------------------------------------------------------------------------------------------------------------------------------------------------------------------|
| No.14              | Journal         | Korean Society of Environmental Engineers                                                                                                                                 |
|                    | Title           | A Study on the Environmental Assessment of Bottled Water using Life Cycle Assessment Methodology                                                                          |
|                    | Author          | Jongsek Kim, Chankyu Lee, Noh-Hyun Lim, Yongkyu Han, and Ihnsup Han                                                                                                       |
|                    | Year/Region     | 2022/ Korea                                                                                                                                                               |
| Goal and Scope     | Goal            | To enhance product environmental performance by assessing key impact categories across the entire life cycle of bottled water products and proposing viable alternatives. |
|                    | Functional unit | A bottled water PET, 500ml, 1 unit                                                                                                                                        |
|                    | System boundary | Cradle-to-grave                                                                                                                                                           |
| Inventory analysis | Software        | ezEPD                                                                                                                                                                     |
|                    | Data source     | EPD                                                                                                                                                                       |

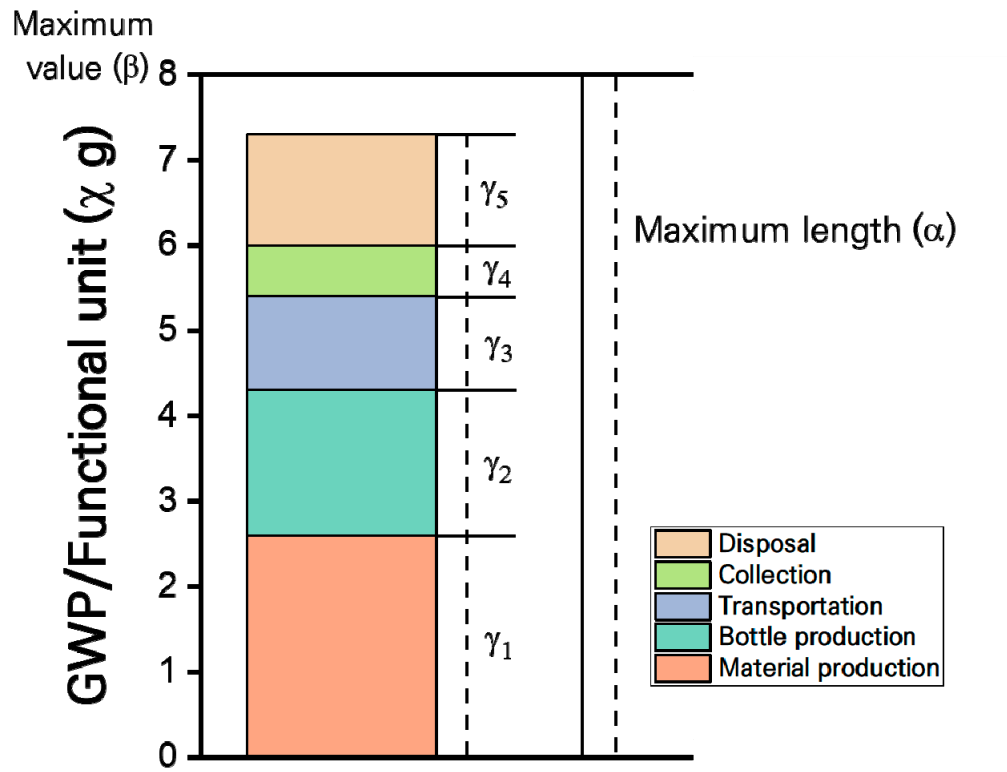

Figure S1. Illustration of how to extract the GWP from a stacked bar chart.

Where

X (g): Functional unit (FU) of study

α: Length of contribution analysis plot

β: Maximum value of contribution analysis plot

γ: Length of each life-cycle phase

$$\frac{\beta \gamma_i}{\alpha} \times \frac{1}{x} \times 1000 = \text{Value of } i\text{th-cycle phase per kg of FU} \quad (\text{S1})$$



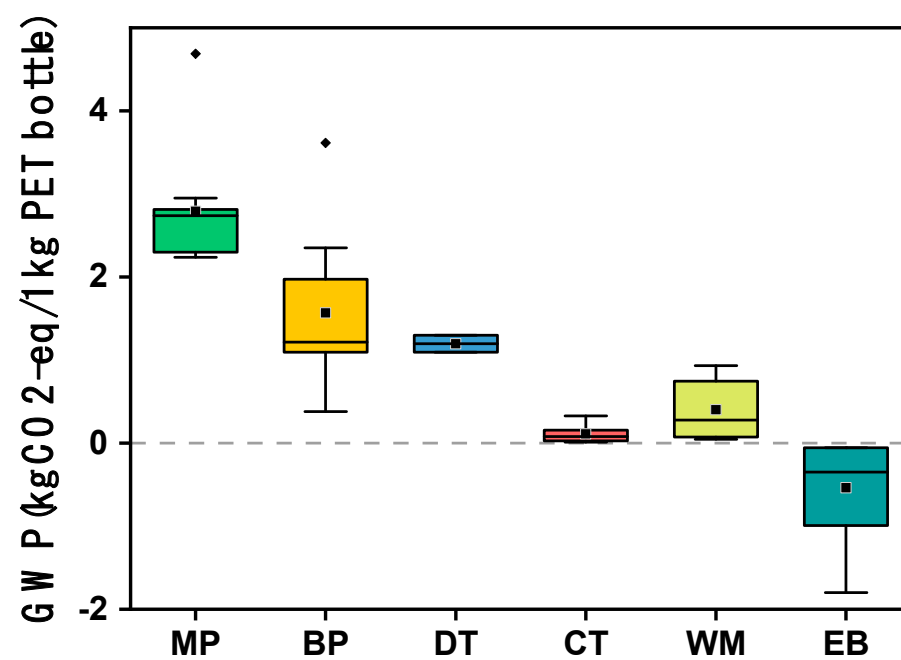

Figure S2. Box plot analysis that encompasses all outliers of GWP values for six phases of the PET bottle system.

Table S2. Organization of capacities and GWP values for Korean EPD products.

| Product volume | kgCO <sub>2</sub> eq per 1kg | gCO <sub>2</sub> eq per 100mL |
|----------------|------------------------------|-------------------------------|
| 0.33 L         | 4.825                        | 22.95                         |
| 0.33 L         | 5.225                        | 24.86                         |
| 0.33 L         | 4.826                        | 22.96                         |
| 0.33 L         | 4.262                        | 20.28                         |
| 0.33 L         | 5.502                        | 26.18                         |
| 0.33 L         | 5.502                        | 26.18                         |
| 0.33 L         | 7.213                        | 32.36                         |
| 0.5 L          | 5.780                        | 20.81                         |
| 0.5 L          | 4.591                        | 16.53                         |
| 0.5 L          | 4.164                        | 14.99                         |
| 0.5 L          | 4.141                        | 14.91                         |
| 0.5 L          | 4.141                        | 14.91                         |
| 0.5 L          | 4.631                        | 16.67                         |
| 0.5 L          | 5.601                        | 20.16                         |
| 0.5 L          | 3.667                        | 13.2                          |
| 0.5 L          | 8.009                        | 28.83                         |
| 0.5 L          | 5.364                        | 19.31                         |
| 0.5 L          | 5.517                        | 19.86                         |
| 1 L            | 3.238                        | 11.43                         |
| 1 L            | 4.655                        | 16.43                         |
| 1 L            | 6.912                        | 24.4                          |
| 2 L            | 4.999                        | 9.5                           |
| 2 L            | 6.223                        | 11.82                         |
| 2 L            | 5.211                        | 9.9                           |
| 2 L            | 5.473                        | 10.4                          |
| 2 L            | 5.473                        | 10.4                          |
| 2 L            | 5.896                        | 11.2                          |
| 2 L            | 8.157                        | 15.5                          |
| 2 L            | 5.366                        | 10.2                          |
| 2 L            | 7.753                        | 14.73                         |
| 2 L            | 5.462                        | 10.38                         |
| 2 L            | 5.779                        | 10.98                         |

Table S3. Results of the Games–Howell post hoc test for GWP values of EPD products per 1kg.

| Dependent variable: GWP (kg CO <sub>2</sub> eq per 1kg) |                    |                          |                |         |                         |             |
|---------------------------------------------------------|--------------------|--------------------------|----------------|---------|-------------------------|-------------|
| Product volume (I)                                      | Product volume (J) | Difference in means(I-J) | Standard error | P-value | 95% Confidence interval |             |
|                                                         |                    |                          |                |         | Lower limit             | Upper limit |
| 0.33L                                                   | 0.5L               | 0.281                    | 0.508          | 0.944   | -1.1816                 | 1.7443      |
|                                                         | 1L                 | 0.401                    | 1.127          | 0.981   | -5.9685                 | 6.7714      |
|                                                         | 2L                 | -0.645                   | 0.472          | 0.539   | -2.0174                 | .7281       |
| 0.5L                                                    | 0.33L              | -0.281                   | 0.508          | 0.944   | -1.7443                 | 1.1816      |
|                                                         | 1L                 | 0.120                    | 1.130          | 0.999   | -6.1943                 | 6.4345      |
|                                                         | 2L                 | -0.926                   | 0.480          | 0.249   | -2.2724                 | .4204       |
| 1L                                                      | 0.33L              | -0.401                   | 1.127          | 0.981   | -6.7714                 | 5.9685      |
|                                                         | 0.5L               | -0.120                   | 1.130          | 0.999   | -6.4345                 | 6.1943      |
|                                                         | 2L                 | -1.046                   | 1.114          | 0.793   | -7.5900                 | 5.4978      |
| 2L                                                      | 0.33L              | 0.645                    | 0.472          | 0.539   | -.7281                  | 2.0174      |
|                                                         | 0.5L               | 0.926                    | 0.480          | 0.249   | -.4204                  | 2.2724      |
|                                                         | 1L                 | 1.046                    | 1.114          | 0.793   | -5.4978                 | 7.5900      |

\*. The mean difference is significant at the 0.05 level.

Table S4. Results of the Games–Howell post hoc test for GWP values of EPD products per 100ml.

| Dependent variable: GWP (gCO <sub>2</sub> eq per 100ml) |                    |                          |                |         |                         |             |
|---------------------------------------------------------|--------------------|--------------------------|----------------|---------|-------------------------|-------------|
| Product volume (I)                                      | Product volume (J) | Difference in means(I-J) | Standard error | P-value | 95% Confidence interval |             |
|                                                         |                    |                          |                |         | Lower limit             | Upper limit |
| 0.33L                                                   | 0.5L               | 6.912*                   | 1.952          | 0.015   | 1.2496                  | 12.5740     |
|                                                         | 1L                 | 7.690                    | 4.043          | 0.400   | -13.9960                | 29.3760     |
|                                                         | 2L                 | 13.745*                  | 1.561          | <0.001  | 8.7560                  | 18.7349     |
| 0.5L                                                    | 0.33L              | -6.912*                  | 1.952          | 0.015   | -12.5740                | -1.2496     |
|                                                         | 1L                 | 0.778                    | 3.999          | 0.997   | -21.4059                | 22.9623     |
|                                                         | 2L                 | 6.834*                   | 1.441          | 0.002   | 2.6425                  | 11.0248     |
| 1L                                                      | 0.33L              | -7.690                   | 4.043          | 0.400   | -29.3760                | 13.9960     |
|                                                         | 0.5L               | -0.778                   | 3.999          | 0.997   | -22.9623                | 21.4059     |
|                                                         | 2L                 | 6.055                    | 3.823          | 0.528   | -19.0641                | 31.1751     |
| 2L                                                      | 0.33L              | -13.745*                 | 1.561          | <0.001  | -18.7349                | -8.7560     |
|                                                         | 0.5L               | -6.834*                  | 1.441          | 0.002   | -11.0248                | -2.6425     |
|                                                         | 1L                 | -6.055                   | 3.823          | 0.528   | -31.1751                | 19.0641     |

\*. The mean difference is significant at the 0.05 level.
